# Supplementary material for: Pharmacogenomics in drug-induced cardiotoxicity: Current status and the future
Source: PubMed Central journal article supplement (PMC9606405; doi:10.3389/fcvm.2022.966261), 2022-10-13
Supplement: Table_1.pdf [file Table_1.pdf]

## Supplementary table

1

| Gene                              | SNP        | amino acid | Drug                                   | Effects of alleles on risk of cardiotoxicity | Cardiac toxicity                                                              | Function of gene                                                                              | Association with drug cardiac toxicity                                                                                                                                                                                                                    |
|-----------------------------------|------------|------------|----------------------------------------|----------------------------------------------|-------------------------------------------------------------------------------|-----------------------------------------------------------------------------------------------|-----------------------------------------------------------------------------------------------------------------------------------------------------------------------------------------------------------------------------------------------------------|
| Drug transporters                 |            |            |                                        |                                              |                                                                               |                                                                                               |                                                                                                                                                                                                                                                           |
| <i>ABCC1</i><br>(18, 23, 25, 113) | rs246221   | Val275 Val | Epirubicin, Anthracyclines, Idarubicin | Increased                                    | Arrhythmia, pericarditis, myocarditis, heart failure, ventricular dysfunction | Drug transporter implicated in energy-dependent transport of cytotoxic agents out of the cell | rs246221 TC/TT genotype is associated with lower LVEF after anthracyclines; <i>ABCC1</i> gene polymorphisms result in reduced <i>ABCC1</i> -mediated drug efflux, which attenuates the ability to scavenge reactive oxygen species from the extracellular |
|                                   | rs4148350  | N/A        |                                        | Increased                                    |                                                                               |                                                                                               |                                                                                                                                                                                                                                                           |
|                                   | rs45511401 | Gly671 Val |                                        | Increased                                    |                                                                               |                                                                                               |                                                                                                                                                                                                                                                           |

|                   |           |            |                                                                                     |           |                                                                                                    |                                                                                                               |
|-------------------|-----------|------------|-------------------------------------------------------------------------------------|-----------|----------------------------------------------------------------------------------------------------|---------------------------------------------------------------------------------------------------------------|
|                   |           |            |                                                                                     |           |                                                                                                    | environment and promotes anthracycline-induced cardiotoxicity.                                                |
| <i>ABCC2</i>      | rs8187710 | Cys151Tyr  | Anthracines, Regorafenib, Sorafenib, Mitoxantrone, Taxanes, Cisplatin, methotrexate | Increased | Myocardial ischemia and infarction, Heart failure, Cardiac dysfunction, arrhythmia, cardiomyopathy | rs8187710 impairs <i>ABCC2</i> ATPase activity, resulting in decreased <i>ABCC2</i> efflux activity;          |
| (18,21,23,10,113) | rs8187694 | Val1188Glu |                                                                                     | Increased |                                                                                                    |                                                                                                               |
|                   | rs3740066 | Ile1324Ile |                                                                                     | Increased |                                                                                                    | rs3740066 common GG genotype was associated with decreased FS and EF values; It may modify the mRNA stability |
| <i>ABCB4</i>      | rs1149222 | N/A        |                                                                                     | Increased |                                                                                                    |                                                                                                               |

Pharmacogenomics in drug-induced cardiotoxicity

|                                 |           |            |                                     |           |                                                            |                                                                                                                                                                            |
|---------------------------------|-----------|------------|-------------------------------------|-----------|------------------------------------------------------------|----------------------------------------------------------------------------------------------------------------------------------------------------------------------------|
| (17,18,22-23)                   | rs4148808 | N/A        | Anthracyclines                      | Increased | heart failure                                              | rs4148808 is located in the promoter region of the gene and may affect expression, leading to intracellular accumulation of anthracyclines.                                |
| <i>ABCC5</i><br>(18,23,107,113) | rs7627754 | N/A        | Fluorouracil (5-FU), Anthracyclines | Increased | Cardiomyopathy, reduced left ventricular ejection fraction | rs7627754 may affect transcriptional regulation of <i>ABCC5</i> , and polymorphisms in <i>ABCC5</i> contribute to drug-cardiac toxicity through modulation of cGMP levels. |
| <i>ABCB1</i>                    | rs1128503 | Gly412 Gly | Idarubicin,                         | Decreased | Bradycardia,                                               | SNPs were                                                                                                                                                                  |

Pharmacogenomics in drug-induced cardiotoxicity

(17-18,23,25,113)

|           |                       |                                                                                                           |           |                                                                                                                                                                                                                                                     |                                                                                                                                                                         |
|-----------|-----------------------|-----------------------------------------------------------------------------------------------------------|-----------|-----------------------------------------------------------------------------------------------------------------------------------------------------------------------------------------------------------------------------------------------------|-------------------------------------------------------------------------------------------------------------------------------------------------------------------------|
| rs2032582 | Ser89<br>3Ala/<br>Thr | Tyrosine kinase                                                                                           | Decreased | QTc prolongation                                                                                                                                                                                                                                    | related to altered SNPs                                                                                                                                                 |
| rs1045642 | Ile1145 Ile           | inhibitors, Anthracyclines, Cyclophosphamide, Melphalan, Mitomycin C, Capecitabine, Taxanes, Lenalidomide | Decreased | Cardiomyopathy, Atrial fibrillation, atrial flutter, Arrhythmia, Congestive heart failure, left ventricular dysfunction, torsades de pointes, Myocardial ischemia and infarction, pericarditis, myocarditis, heart failure, ventricular dysfunction | increased<br><br>ABCB1 mRNA levels in cardiac endothelial cells, could decrease the intracardiac concentrations of drugs that cause QT prolongation and cardiotoxicity. |

Pharmacogenomics in drug-induced cardiotoxicity

|                                 |                                      |                     |                |                                     |                                                      |                                                                                    |                                                                                                                                                                                                                        | Paroxysmal arrhythmias |
|---------------------------------|--------------------------------------|---------------------|----------------|-------------------------------------|------------------------------------------------------|------------------------------------------------------------------------------------|------------------------------------------------------------------------------------------------------------------------------------------------------------------------------------------------------------------------|------------------------|
| <i>SLC22A6</i><br>(21,23)       | rs6591722                            | N/A                 | Anthracyclines | Increased                           | Decreased left ventricular function                  | multispecific organic anion drug transporter                                       | rs6591722 polymorphism mediates SF reduction.                                                                                                                                                                          |                        |
| <i>SLC28A3</i><br>(18,22-23,26) | rs7853758<br>rs4877847<br>rs11140490 | L461L<br>N/A<br>N/A | Anthracyclines | Decreased<br>Decreased<br>Decreased | Reduced influx of anthracyclines into cardiomyocytes | Sodium-dependent transporter involved in the homeostasis of endogenous nucleosides | Carriers of the rs7853758 minor allele exhibit reduced <i>SLC28A3</i> mRNA expression.<br><br>rs11140490 exerts its cardioprotective action by regulating an <i>SLC28A3</i> -overlapping, antisense long noncoding RNA |                        |

SLC28A  
3-AS1.

|                            |           |     |                                    |           |                                                      |                                                                    |
|----------------------------|-----------|-----|------------------------------------|-----------|------------------------------------------------------|--------------------------------------------------------------------|
| <i>SLC10A2</i><br>(23,25)  | rs9514091 | N/A | Anthracyclines                     | Decreased | Decrease enterohepatic circulation of anthracyclines | a transporter responsible for the reabsorption of ileal bile acids |
| <i>SLC22A7</i><br>(25,115) | rs4149178 | N/A | Capecitabine, Anthracyclines, 5-FU | Decreased | Reduced anthracycline transport                      | multispecific organic anion drug transporter                       |
| <i>SLCO1A2</i><br>(23,116) | rs2857468 | N/A | Anthracyclines                     | Decreased | Reduced anthracycline transport                      | mediates intracellular influx of drugs                             |
| <i>SLC22A17</i><br>(23)    | rs4982753 | N/A | Anthracyclines                     | Decreased | Reduced anthracycline transport                      | multispecific organic anion drug transporter                       |

Drug metabolism enzymes

|                          |           |       |           |           |                                    |                                                              |                                    |
|--------------------------|-----------|-------|-----------|-----------|------------------------------------|--------------------------------------------------------------|------------------------------------|
| <i>CYP2B6</i><br>(27-28) | c.499C>G  | P167A | Methadone | Increased | prolongation of the QT interval of | Catalyze the metabolism of clinical drugs such as efavirenz, | SNPs affect the hydrophobicity and |
|                          | c.1172T>A | I391N |           | Increased |                                    |                                                              |                                    |

**Pharmacogenomics in drug-induced cardiotoxicity**

|           |               |           |                                               |                                              |                                                                                                                                                                                                                                                                          |
|-----------|---------------|-----------|-----------------------------------------------|----------------------------------------------|--------------------------------------------------------------------------------------------------------------------------------------------------------------------------------------------------------------------------------------------------------------------------|
| c.415A>G  | K139<br>E     | Increased | the<br>cardiac<br>electrical<br>cycle,<br>TDP | cyclophosphamide,<br>bupropion,<br>methadone | conformation of the protein, resulting in alteration of the metabolic rate ;                                                                                                                                                                                             |
| C.445G>A  | E149<br>K     | Increased | induces<br>aLQT<br>S                          |                                              | rs8192719 and rs3211371 lead to a decreased expression or decreased enzyme activity of CYP2B6 ;rs3745274 has been associated with increased levels of a hepatic splicing variant lacking exon 4–6 and decreased protein levels, caused by erroneous splicing, leading to |
| rs3745274 | Gln172<br>Gln | Increased |                                               |                                              |                                                                                                                                                                                                                                                                          |
| rs8192719 | N/A           | Increased |                                               |                                              |                                                                                                                                                                                                                                                                          |
| rs3211371 | Arg487<br>Cys | Increased |                                               |                                              |                                                                                                                                                                                                                                                                          |

|                                     |                           |                |                                                                                                                                              |                            |                                                                                                    |                                                                                                                                                                                         |                                                                                                             |
|-------------------------------------|---------------------------|----------------|----------------------------------------------------------------------------------------------------------------------------------------------|----------------------------|----------------------------------------------------------------------------------------------------|-----------------------------------------------------------------------------------------------------------------------------------------------------------------------------------------|-------------------------------------------------------------------------------------------------------------|
|                                     |                           |                |                                                                                                                                              |                            |                                                                                                    |                                                                                                                                                                                         | decrease<br>d<br>metaboli<br>sm of<br>substrate<br>s                                                        |
| <i>CYP3A4</i><br>(28)               | c.1000G><br>T             | E333<br>*      | Meth<br>adon<br>e                                                                                                                            | Increased                  | TDP                                                                                                | metabolize<br>endogenous<br>compounds<br>and<br>xenobiotics                                                                                                                             | CYP3A<br>4 SNP<br>polymor<br>phism is<br>associat<br>ed with<br>increase<br>d blood<br>methado<br>ne levels |
| <i>CYP3A5</i><br>(21,32-<br>33,114) | rs776746<br><br>rs4646450 | N/A<br><br>N/A | Anthr<br>acycl<br>ines/<br>Cycl<br>opho<br>spha<br>mide<br>+<br>Doxo<br>rubici<br>n+<br>Vinc<br>ristine<br>+<br>Predn<br>isone<br>(CH<br>OP) | Increased<br><br>Increased | fractio<br>nal<br>shorte<br>ning≤<br>28%,d<br>ecreas<br>ed left<br>ventri<br>cular<br>functi<br>on | rs77674<br>6 and<br>rs10264<br>272 may<br>modify<br>its<br>alternati<br>ve<br>splicing<br>and<br>protein<br>truncatio<br>n, which<br>can<br>result in<br>a less<br>active<br>CYP3A<br>5 |                                                                                                             |
| <i>CBR1</i><br>(23,34-38)           | rs9024                    | N/A            | Anthr<br>acycl<br>ines                                                                                                                       | Increased                  | acute<br>cardiac<br>injury<br>,chron<br>ic<br>conge<br>stive                                       | use NADPH<br>(reduced<br>form of<br>nicotinamid<br>e adenine<br>dinucleotide<br>phosphate)<br>as a<br>cofactor to                                                                       | It is a<br>3'-UTR<br>SNP<br>that<br>interfere<br>with the<br>inhibitor<br>y effects<br>of hsa-<br>miR-      |



|                                 |           |           |                         |           |                                                        |                                                                         |                                                                                                                                                         |
|---------------------------------|-----------|-----------|-------------------------|-----------|--------------------------------------------------------|-------------------------------------------------------------------------|---------------------------------------------------------------------------------------------------------------------------------------------------------|
|                                 |           |           |                         |           | heart failure                                          | catalyze the two-electron reduction processes and metabolized drugs     | 574-5p and hsa-miR-921 on CBR1 mRNA expression, the mutant A allele was initially observed to increase its mRNA and protein expression and its activity |
| <i>CBR3</i><br>(18,23,39,41-42) | rs1056892 | Val244Met | Anthracines/Trastuzumab | Increased | acute cardiac injury, chronic congestive heart failure |                                                                         | Val244 (rs1056892 G) allele catalyzes the synthesis of the cardiotoxic metabolite doxorubicinol                                                         |
| <i>UGT1A6</i><br>(22,44)        | rs6759892 | Ser7Ala   | Anthracines             | Increased | Decline in Left ventricular fractional                 | catalyze the glucuronidation of endogenous or exogenous small compounds |                                                                                                                                                         |

|                              |            |     |                                                                                       |           | shortening                                        |                                                                                                                                                                      |                                                                                                |
|------------------------------|------------|-----|---------------------------------------------------------------------------------------|-----------|---------------------------------------------------|----------------------------------------------------------------------------------------------------------------------------------------------------------------------|------------------------------------------------------------------------------------------------|
| <i>UGT2B7-161</i><br>(43,45) | rs7668258  | N/A | Pertuzumab, trastuzumab, Anthracyclines, epirubicin/cyclophosphamide-docetaxel (EC-D) | Increased | Heart failure, decline in LVEF                    | catalyze the glucuronidation of a diverse chemical base including steroids, bile acids, and opioids                                                                  | Its polymorphism alter glucuronidation ability and to affect metabolism and toxicity of drugs. |
| <i>HNMT</i><br>(22)          | rs17583889 | N/A | Anthracyclines                                                                        | Increased | Heart failure                                     | histamine-metabolizing enzyme                                                                                                                                        |                                                                                                |
| <i>CYPOR</i><br>(109)        | rs13240755 | N/A | Anthracyclines                                                                        | Increased | drop of left ventricular ejection fraction (LVEF) | a steroidogenic and drug-metabolizing enzyme which helps in the NADPH dependent transfer of electrons to cytochrome P450 (CYP) enzymes for their biological activity | This gene polymorphism results in decreased left ventricular ejection fraction.                |

|                          |           |               |                |           |                                        |                                                                                                                                                                                                                |                                                                                                                                                                                                                                                                                                     |
|--------------------------|-----------|---------------|----------------|-----------|----------------------------------------|----------------------------------------------------------------------------------------------------------------------------------------------------------------------------------------------------------------|-----------------------------------------------------------------------------------------------------------------------------------------------------------------------------------------------------------------------------------------------------------------------------------------------------|
| <i>NOS3</i><br>(107-108) | rs1799983 | Asp2<br>98Glu | Anthracyclines | Decreased | myocardial infarction, ischemic stroke | Generates nitric oxide with L-arginine in the endothelium which serves as an important deterrent to the pathogenesis of thrombosis by modulating the activation, adhesion and aggregate formation of platelets | In a cohort of children treated with DOX, the TT genotype of rs1799983 was associated with protection from cardiotoxicity, whereas in the Chinese AML patient cohort, NOS3 rs1799983 wild-type genotype carriers were associated with higher overall survival (OS) and higher NOS3 mRNA expression. |
|--------------------------|-----------|---------------|----------------|-----------|----------------------------------------|----------------------------------------------------------------------------------------------------------------------------------------------------------------------------------------------------------------|-----------------------------------------------------------------------------------------------------------------------------------------------------------------------------------------------------------------------------------------------------------------------------------------------------|

Pharmacodynamics related genes or drug targets

Pharmacogenomics in drug-induced cardiotoxicity

|                                |                        |                |              |           |                                                          |                                              |                                                                                                                                                              |
|--------------------------------|------------------------|----------------|--------------|-----------|----------------------------------------------------------|----------------------------------------------|--------------------------------------------------------------------------------------------------------------------------------------------------------------|
| <i>No gene</i><br>(47)         | rs9316695              | /              | Trastuzumab  | Increased | drop of LVEF                                             | Unknown                                      | Unknown                                                                                                                                                      |
| <i>No gene</i><br>(47)         | rs2841572 <sub>2</sub> | /              |              | Increased |                                                          |                                              |                                                                                                                                                              |
| <i>No gene</i><br>(47)         | rs7406710              | /              |              | Increased |                                                          |                                              |                                                                                                                                                              |
| <i>No gene</i><br>(47)         | rs1193285 <sub>3</sub> | /              |              | Increased |                                                          |                                              |                                                                                                                                                              |
| <i>No gene</i><br>(47)         | rs8032978              | /              |              | Increased |                                                          |                                              |                                                                                                                                                              |
| <i>HER-2</i><br>(24,48-49,112) | rs1801201              | Ile65<br>4Val  | Trastuzumab, | Increased | Symptomatic congestive heart failure,                    | the molecular marker of ductal breast cancer | rs1136201 polymorphism leads to enhanced dimerization of HER2 molecule and binds neuregulin to activate the ERBB pathway and affects cardiomyocyte survival. |
|                                | rs1136201              | Ile65<br>5/Val | Lapatinib    | Increased |                                                          |                                              |                                                                                                                                                              |
|                                | rs1058808              | Pro1170Ala     |              | Increased | asymptomatic left ventricular ejection fraction decline. |                                              | rs1058808 alter the                                                                                                                                          |

|                       |             |     |                                                          |           |                                                                                           |                                                                                                                                        |
|-----------------------|-------------|-----|----------------------------------------------------------|-----------|-------------------------------------------------------------------------------------------|----------------------------------------------------------------------------------------------------------------------------------------|
|                       |             |     |                                                          |           |                                                                                           | protein sequence of the HER2-neu protein thus increased trastuzumab cardiotoxicity.                                                    |
| <i>PDGFRα</i><br>(51) | rs191188930 | N/A | Sunitinib, pazopanib, sorafenib, dasatinib and nilotinib | Increased | cardiac fibrosis, Loeffler endocarditis, heart sarcoma and organic heart disease.         | an isoform of the PDGFR family of tyrosine kinase receptors involved in cell proliferation, survival, differentiation, and growth      |
| <i>EGFR</i><br>(51)   | rs142136033 | N/A | Sunitinib, sorafenib, dasatinib and lapatinib            | Increased | myocardial infarction, congestive heart failure, hypertrophic cardiomyopathy, myocarditis | a growth factor receptor that induces cell differentiation and proliferation upon activation through the binding of one of its ligands |

Oxidative stress related gene

|                        |            |              |                         |           |                      |                                                                                                                                                                                                                                                                                                                 |                                                                                                                                                                                                                                                                      |
|------------------------|------------|--------------|-------------------------|-----------|----------------------|-----------------------------------------------------------------------------------------------------------------------------------------------------------------------------------------------------------------------------------------------------------------------------------------------------------------|----------------------------------------------------------------------------------------------------------------------------------------------------------------------------------------------------------------------------------------------------------------------|
| <i>HAS3</i><br>(17,54) | rs2232228  | Ala93<br>Ala | Anthracyclines          | Increased | cardiomyopathy       | HAS3 encodes an enzyme involved in the synthesis of hyaluronan, a component of extracellular matrix that serves as a scaffold for organizing the cardiac cells, particularly during remodeling after injury. Hyaluronan also has anti-oxidant properties that promotes cardiac survival from oxidative stresses | The rs2232228 A/A genotype significantly reduces the expression of HAS3 mRNA levels, resulting in low hyaluronic acid levels, which may increase susceptibility to reactive oxygen species following anthracycline exposure and increase the risk of cardiotoxicity. |
| <i>RAC2</i>            | rs13058338 | N/A          | rituximab-cyclophosphos | Increased | heart failure, myoca | Plasma membrane-associated GTPase that                                                                                                                                                                                                                                                                          | Affects splicing or transcrip                                                                                                                                                                                                                                        |

|                            |        |            |                                                                             |           |                                                     |                                                                                                                                                  |                                                                                                                                                                                                     |
|----------------------------|--------|------------|-----------------------------------------------------------------------------|-----------|-----------------------------------------------------|--------------------------------------------------------------------------------------------------------------------------------------------------|-----------------------------------------------------------------------------------------------------------------------------------------------------------------------------------------------------|
| (18,20,117)                |        |            | phamide, doxorubicin, vincristine, and prednisone (R-CHO P); Anthracyclines |           | rdial fibrosis, Myocardial necrosis                 | binds to a variety of effector proteins to regulate cellular responses. RAC2 augments the production of reactive oxygen species by NADPH oxidase | tion of RAC2 thereby affecting RAC2 mRNA and protein expression                                                                                                                                     |
| <i>CYBA</i><br>(18,20,111) | rs4673 | Tyr 72 His | Anthracyclines                                                              | Increased | Arrhythmia, heart failure, myocarditis-pericarditis | <i>CYBA</i> associates with NOX3 to form a NADPH oxidase constitutively generating superoxide                                                    | Affects heme binding site and thus protein stability. Reduced NAD(P)H oxidase activity in T allele carriers results in impaired ROS defenses and increased ROS levels under anthracycline exposure. |

|                            |           |     |                                                                                                   |           |                                               |                                                                                                                                                                                                                 |                                                                                                      |
|----------------------------|-----------|-----|---------------------------------------------------------------------------------------------------|-----------|-----------------------------------------------|-----------------------------------------------------------------------------------------------------------------------------------------------------------------------------------------------------------------|------------------------------------------------------------------------------------------------------|
| <i>NCF4</i><br>(18,20,118) | rs1883112 | N/A | Anthracyclines, doxorubicin concurrently with cyclophosphamide, vincristine and prednisone (CHOP) | Increased | cardiac fibrosis, heart failure, drop of LVEF | Component of the NADPH-oxidase, a multicomponent enzyme system responsible for the oxidative burst in which electrons are transported from NADPH to molecular oxygen, generating reactive oxidant intermediates | Homozygous A-allele carriers associated with ACT by downregulation of the NADPH-oxidase subunit NCF4 |
|----------------------------|-----------|-----|---------------------------------------------------------------------------------------------------|-----------|-----------------------------------------------|-----------------------------------------------------------------------------------------------------------------------------------------------------------------------------------------------------------------|------------------------------------------------------------------------------------------------------|

Iron transport and metabolism related genes

|                         |           |           |                |           |              |                                                                                                                                                                                        |                                                      |
|-------------------------|-----------|-----------|----------------|-----------|--------------|----------------------------------------------------------------------------------------------------------------------------------------------------------------------------------------|------------------------------------------------------|
| <i>C282Y</i><br>(60-61) | rs1800562 | Cys282Tyr | Anthracyclines | Increased | drop of LVEF | Linked to the major histocompatibility complex (MHC) on chromosome 6p, HFE encodes the MHC class I-like protein HFE that binds beta-2 microglobulin. HFE influences iron absorption by | Harmful iron deposits lead to myocardial cell damage |
| <i>H63D</i><br>(60-61)  | rs1799945 | His63Asp  | Anthracyclines | Increased |              |                                                                                                                                                                                        |                                                      |



modulating the expression of hepcidin, the main controller of iron metabolism.

Cardiac ion channel genes

|                          |           |          |           |           |                                                                  |                                                                                    |                                                                                                                                                      |
|--------------------------|-----------|----------|-----------|-----------|------------------------------------------------------------------|------------------------------------------------------------------------------------|------------------------------------------------------------------------------------------------------------------------------------------------------|
| <i>KCNE1</i><br>(65,119) | rs1805128 | Asp85Asn | Methadone | Increased | TDP, Acquired long QT syndrome                                   | regulates the function of the KCNQ1 channel                                        | Co-expression of KCNE1 D85N with KCNQ1 and KCNH2 leads to impaired IKr and IKs, disruption of repolarized potassium currents, and induction of aLQTS |
| <i>KCNE2</i><br>(65)     | c.22A>G   | Thr8Ala  | Methadone | Increased | Prolongation of the QT interval of the cardiac electrical cycle, | a functionally versatile, ubiquitously expressed potassium channel $\beta$ subunit |                                                                                                                                                      |

|                      |           |       |           |           | Acquired long QT syndrome                                                                  |                                                                                                                                                                                                              |                                                                                                                     |
|----------------------|-----------|-------|-----------|-----------|--------------------------------------------------------------------------------------------|--------------------------------------------------------------------------------------------------------------------------------------------------------------------------------------------------------------|---------------------------------------------------------------------------------------------------------------------|
| <i>SCN5A</i><br>(65) | c.1715C>A | A572D | Methadone | Increased | Prolongation of the QT interval of the cardiac electrical cycle, Acquired long QT syndrome | encodes the alpha subunit of the main cardiac sodium channel Nav1.5. This channel predominates inward sodium current (INa) and plays a critical role in regulation of cardiac electrophysiological function. | SNPs inhibit cardiac hERG Na <sup>+</sup> channels and inhibit late Na <sup>+</sup> currents leading to arrhythmias |
|                      | c.569G>A  | R190Q |           | Increased |                                                                                            |                                                                                                                                                                                                              |                                                                                                                     |
| <i>KCNQ1</i><br>(65) | c.733G>A  | G245R | Methadone | Increased | Prolongation of the QT interval of the cardiac electrical cycle, Acquired long QT          | a voltage-dependent potassium channel                                                                                                                                                                        |                                                                                                                     |
|                      | c.727C>T  | R243C |           | Increased |                                                                                            |                                                                                                                                                                                                              |                                                                                                                     |

|                      |           |            |           |           |                                                                                            |                                                                                                                                   |                                                                                         |
|----------------------|-----------|------------|-----------|-----------|--------------------------------------------------------------------------------------------|-----------------------------------------------------------------------------------------------------------------------------------|-----------------------------------------------------------------------------------------|
|                      |           |            |           |           | syndrome                                                                                   |                                                                                                                                   |                                                                                         |
| <i>KCNH2</i><br>(65) | c.3163C>T | R105<br>5W | Methadone | Increased | Prolongation of the QT interval of the cardiac electrical cycle, Acquired long QT syndrome | encoding for Kv11.1 or hERG channels and transports the rapid component of the cardiac delayed rectifying K <sup>+</sup> current. | SNPs cause mild IKs channel dysfunction, leading to severe arrhythmias and sudden death |

Myocardial sarcomere structure or transcriptional regulation related gene

|                           |           |                           |             |           |                                                 |                                                                                                                                                                                                                                  |                                                                                                                                                                             |
|---------------------------|-----------|---------------------------|-------------|-----------|-------------------------------------------------|----------------------------------------------------------------------------------------------------------------------------------------------------------------------------------------------------------------------------------|-----------------------------------------------------------------------------------------------------------------------------------------------------------------------------|
| <i>RARG</i><br>(15,67-69) | rs2229774 | Ser306/355/405/416/427Leu | Anthracines | Increased | heart failure, asymptomatic cardiac dysfunction | As one of the subtypes that make up the Nuclear Retinoic Acid receptors (RARs), acts as a ligand-dependent transcriptional regulator, forms a heterodimer with the retinoid X receptor (RXR), and mediates the active metabolism | increase double-strand DNA breaks, reactive oxygen species production, and cell death. reduce mitochondrial numbers and attenuating DNA repair. mediated via suppression of |
|---------------------------|-----------|---------------------------|-------------|-----------|-------------------------------------------------|----------------------------------------------------------------------------------------------------------------------------------------------------------------------------------------------------------------------------------|-----------------------------------------------------------------------------------------------------------------------------------------------------------------------------|

of vitamin A retinoic acid, while promoting proliferation, differentiation, morphogenesis and cell survival

topoisomerase 2 $\beta$  (TOP2B) expression and activation of the cardioprotective extracellular regulated kinase (ERK) pathway

|                         |           |     |                |           |                                                   |                                                                                                          |                                                                                                                                                                                  |
|-------------------------|-----------|-----|----------------|-----------|---------------------------------------------------|----------------------------------------------------------------------------------------------------------|----------------------------------------------------------------------------------------------------------------------------------------------------------------------------------|
| <i>CELF4</i><br>(17,66) | rs1786814 | N/A | Anthracyclines | Increased | Decreased myocardial pump function, heart failure | regulates developmental splicing of the sarcomere thin filament gene encoding cardiac troponin T (TNNT2) | Induction of a mixture of TNNT2 isoforms that interfere with calcium responses and reduced contractility, thereby increasing the risk of cardiac dysfunction after chemotherapy. |
|-------------------------|-----------|-----|----------------|-----------|---------------------------------------------------|----------------------------------------------------------------------------------------------------------|----------------------------------------------------------------------------------------------------------------------------------------------------------------------------------|

Autophagy-related genes

|              |            |   |                 |           |             |                                  |
|--------------|------------|---|-----------------|-----------|-------------|----------------------------------|
| <i>ATG13</i> | rs10838611 | / | Anthracyclines, | Increased | arrhythmia, | an adaptor protein by recruiting |
|--------------|------------|---|-----------------|-----------|-------------|----------------------------------|

(70)

|                                                                                           |                                                                             |                                                                                                                                                                                                               |
|-------------------------------------------------------------------------------------------|-----------------------------------------------------------------------------|---------------------------------------------------------------------------------------------------------------------------------------------------------------------------------------------------------------|
| Cycl<br>opho<br>spha<br>mide,<br>Paclit<br>axel,<br>Doce<br>taxel,<br>Carb<br>oplati<br>n | reduct<br>ion in<br>left<br>ventri<br>cular<br>ejectio<br>n<br>fractio<br>n | ULK1,<br>RB1CC1<br>and<br>ATG101 to<br>a core<br>ULK1<br>complex.<br>The central<br>involvement<br>of ATG13<br>in complex<br>formation<br>makes it an<br>attractive<br>target for<br>autophagy<br>regulation. |
|-------------------------------------------------------------------------------------------|-----------------------------------------------------------------------------|---------------------------------------------------------------------------------------------------------------------------------------------------------------------------------------------------------------|

---

2 \*Stop codon.

3 **References (References cited only in the Supplementary Material)**

4 107. He H, Xu YJ, Yin JY, Li X, Qu J, Xu XJ, et al. Association of nitric oxide synthase 3 (NOS3)  
5 894 G>T polymorphism with prognostic outcomes of anthracycline in Chinese patients with acute  
6 myeloid leukaemia. *Clin Exp Pharmacol Physiol.* (2014)41(6):400-7. doi: 10.1111/1440-1681.12235.

7 108. Krajinovic M, Elbared J, Drouin S, Bertout L, Rezgui A, Ansari M, et al. Polymorphisms of  
8 ABCC5 and NOS3 genes influence doxorubicin cardiotoxicity in survivors of childhood acute  
9 lymphoblastic leukemia. *Pharmacogenomics J.* (2016)16(6):530-535. doi: 10.1038/tpj.2015.63.

10 109. Lubieniecka JM, Graham J, Heffner D, Mottus R, Reid R, Hogge D, et al. A discovery study of  
11 daunorubicin induced cardiotoxicity in a sample of acute myeloid leukemia patients prioritizes  
12 P450 oxidoreductase polymorphisms as a potential risk factor. *Front Genet.* (2013)4:231.  
13 doi:10.3389/fgene.2013.00231

- 14 110. Elens L, Tyteca D, Panin N, Courtoy P, Lison D, Demoulin JB, et al. Functional defect caused  
15 by the 4544G>A SNP in ABCC2: potential impact for drug cellular disposition. *Pharmacogenet*  
16 *Genomics*. (2011)21(12):884-893. doi:10.1097/FPC.0b013e32834d672b.
- 17 111. Wyche KE, Wang SS, Griendling KK, Dikalov SI, Austin H, Rao S, et al. C242T CYBA  
18 polymorphism of the NADPH oxidase is associated with reduced respiratory burst in human  
19 neutrophils. *Hypertension*. (2004)43(6):1246-1251. doi:10.1161/01.HYP.0000126579.50711.62.
- 20 112. Fleishman SJ, Schlessinger J, Ben-Tal N. A putative molecular-activation switch in the  
21 transmembrane domain of erbB2. *Proc Natl Acad Sci U S A*. (2002)99(25):15937-15940.  
22 doi:10.1073/pnas.252640799.
- 23 113. Uddin ME, Moseley A, Hu S, Sparreboom A. Contribution of membrane transporters to  
24 chemotherapy-induced cardiotoxicity. *Basic Clin Pharmacol Toxicol*. (2022)130 Suppl 1:36-47.  
25 doi:10.1111/bcpt.13635.
- 26 114. Ross CJ, Visscher H, Rassekh SR, Castro-Pastrana LI, Shereck E, Carleton B, et al.  
27 Pharmacogenomics of serious adverse drug reactions in pediatric oncology. *J Popul Ther Clin*  
28 *Pharmacol*. (2011)18:e134-e151.
- 29 115. Pellicer M, García-González X, García MI, Robles L, Grávalos C, García-Alfonso P, et al.  
30 Identification of new SNPs associated with severe toxicity to capecitabine. *Pharmacol Res*.  
31 (2017)120:133-137. doi:10.1016/j.phrs.2017.03.021.
- 32 116. Sapp V, Aguirre A, Mainkar G, Ding J, Adler E, Liao R, et al. Genome-wide CRISPR/Cas9  
33 screening in human iPS derived cardiomyocytes uncovers novel mediators of doxorubicin  
34 cardiotoxicity. *Sci Rep*. (2021)11(1):13866. Published 2021 Jul 6. doi:10.1038/s41598-021-92988-  
35 1.

- 36 117. Yang X, Li G, Guan M, Bapat A, Dai Q, Zhong C, et al. Potential Gene Association Studies of  
37 Chemotherapy-Induced Cardiotoxicity: A Systematic Review and Meta-Analysis. *Front*  
38 *Cardiovasc Med.* (2011)8:651269. doi:10.3389/fcvm.2021.651269.
- 39 118. Hertz DL, Caram MV, Kidwell KM, Thibert JN, Gersch C, Seewald NJ, et al. Evidence for  
40 association of SNPs in ABCB1 and CBR3, but not RAC2, NCF4, SLC28A3 or TOP2B, with  
41 chronic cardiotoxicity in a cohort of breast cancer patients treated with anthracyclines.  
42 *Pharmacogenomics.* (2016)17(3):231-240. doi:10.2217/pgs.15.162.
- 43 119. Nishio Y, Makiyama T, Itoh H, Sakaguchi T, Ohno S, Gong YZ, et al. D85N, a KCNE1  
44 polymorphism, is a disease-causing gene variant in long QT syndrome. *J Am Coll Cardiol.*  
45 (2009)54(9):812-819. doi:10.1016/j.jacc.2009.06.005.
